# Supplementary material for: Luminous composite ultrathin films of the DCM dye assembled with layered double hydroxides and its fluorescence solvatochromism properties for polarity sensors
Source: Royal Society of Chemistry journal article supplement (doi:10.1039/c5tc00736d), 2015-01-01
Supplement: c5tc00736d1.pdf [file c5tc00736d1.pdf]

## Supporting Information for

### Luminous Composite Ultrathin Films of DCM Dye Assembled with Layered Double Hydroxides and its fluorescence solvatochromism properties for polarity sensor

Yumei Qin, Ping Zhang, Lincong Lai, Zeyun Tian, Shufang Zheng, and Jun Lu\*

State Key Laboratory of Chemical Resource Engineering, Beijing University of Chemical Technology, Beijing 100029, P. R. China

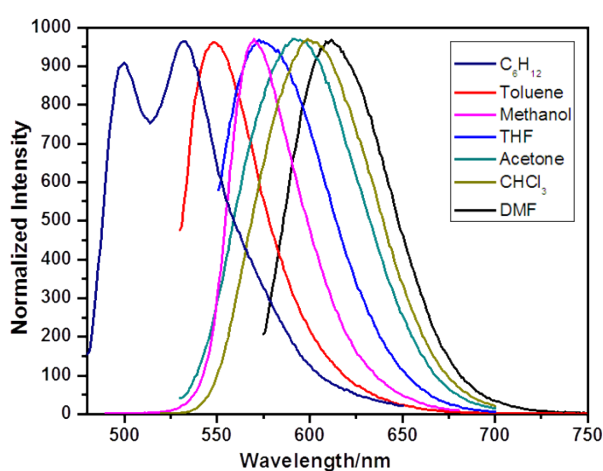

Figure S1. Normalized fluorescence spectra of DCM molecules ( $5 \text{ mg}\cdot\text{L}^{-1}$ ) in different solvents.

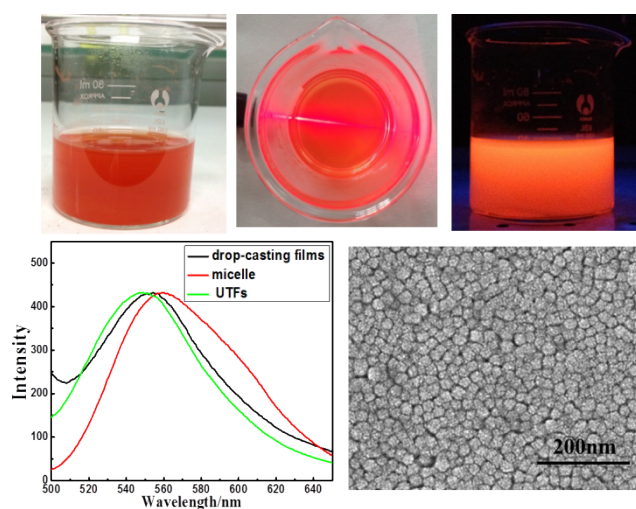

Figure S2. (top) Photographs of the PS-PAA@DCM micelles at daylight; the Tyndall effect with a light beam and under the 365 nm UV illumination; and (bottom) fluorescence spectra of the drop-coating film, micelle and UTFs; and top-view SEM image of the micelles.

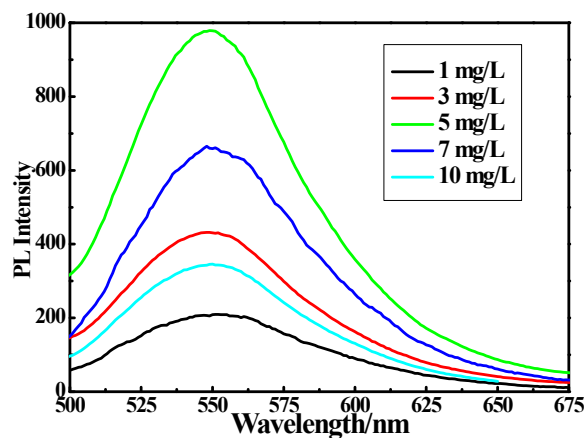

**Figure S3.** Fluorescence spectra of  $(\text{PS-PAA@DCM/LDH})_n$  UTFs with different incorporated DCM concentrations.

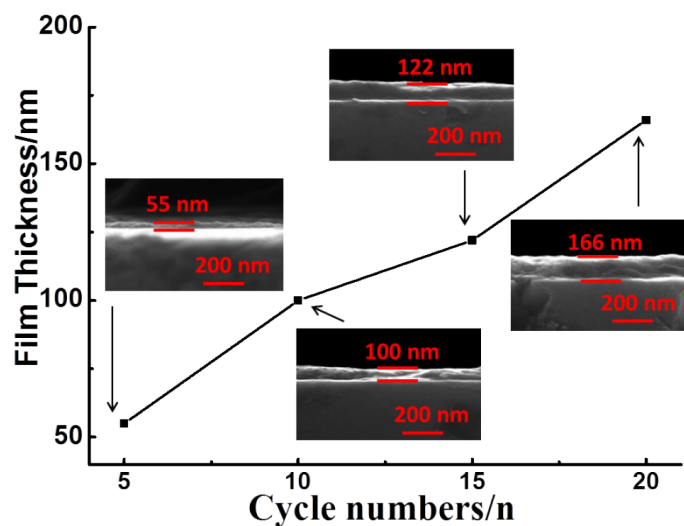

**Figure S4.** Side-view SEM images of  $(\text{PS-PAA@DCM/LDH})_n$  UTFs ( $n = 5, 10, 15, 20$ ) and the plot of thickness vs. bilayer cycle number  $n$ .

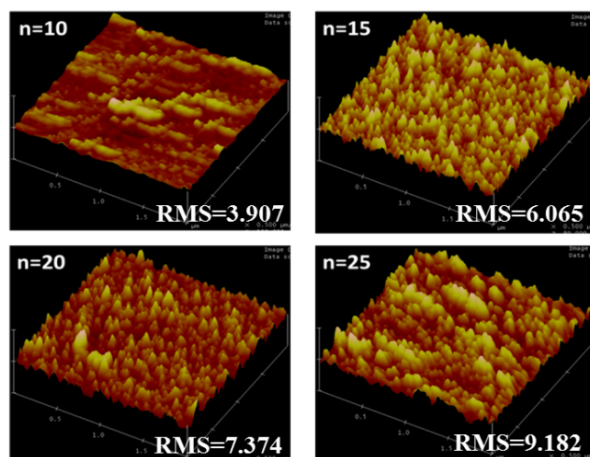

**Figure S5.** Tapping-mode AFM images and RMS (root-mean-square) roughness (nm) of the  $(\text{PS-PAA@DCM/LDH})_n$  UTFs ( $n = 10, 15, 20, 25$ , respectively).

**Table S1.** Fluorescence lifetimes of PS-*b*-PAA@DCM/LDH UTF-20 and PS- PAA@DCM micelle with 488 nm excitation and detection at their own maxima emission

| UTFs                                     | Emission peak | $\langle\tau_i\rangle(\text{ns})^a$ | $A_i(\%)$ | $\langle\tau\rangle(\text{ns})$ | $\chi^2{}^b$ |
|------------------------------------------|---------------|-------------------------------------|-----------|---------------------------------|--------------|
| UTF-20 in dry air                        | 551nm         | 1.785                               | 39.8      | 2.23                            | 1.065        |
|                                          |               | 2.527                               | 60.2      |                                 |              |
| PS-PAA@DCM micelle                       | 560nm         | 1.536                               | 68.69     | 1.88                            | 1.232        |
|                                          |               | 2.641                               | 31.31     |                                 |              |
| DCM DMF solution (5 mg·L <sup>-1</sup> ) | 612nm         | 0.8375                              | 50.13     | 1.66                            | 1.309        |
|                                          |               | 2.483                               | 49.87     |                                 |              |

<sup>a</sup>  $\tau_i$  ( $i = 1, 2$ ) is the fitted fluorescence lifetime.  $A_i$  is the percentage of  $\tau_i$  in the double-exponential case,  $\langle\tau\rangle = A_1\tau_1 + A_2\tau_2$ ;  $A_1 + A_2 = 1$ .)

<sup>b</sup> The goodness-of-fit is indicated by the value of  $\chi^2$ .

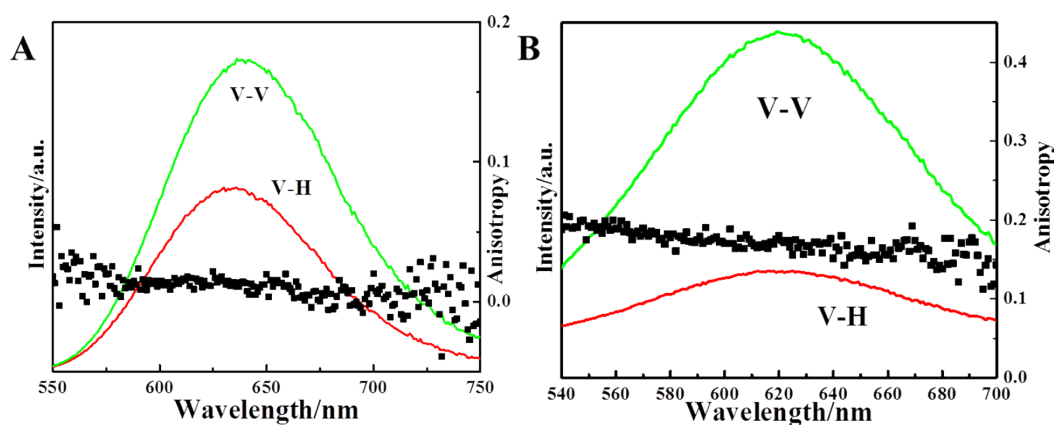

**Figure S6.** Polarized luminescence profiles for the VV and VH modes and anisotropic value ( $r$ ) for DCM DMF solution (5 mg·L<sup>-1</sup>) (A) and PS-*b*-PAA@DCM micelle solution (B).

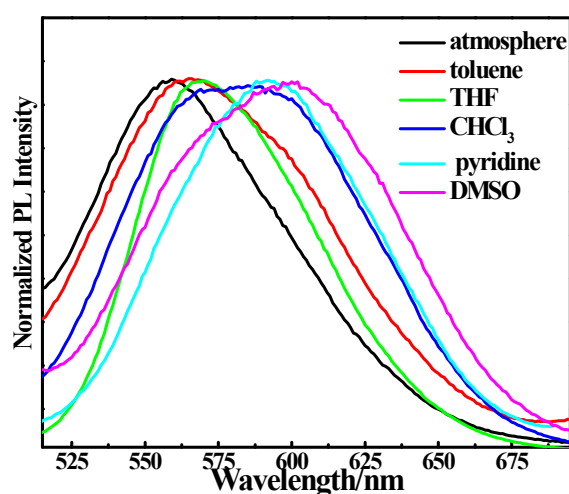

**Figure S7.** Normalized fluorescence spectra of PS-PAA@DCM drop-coating films in different organic solvent vapours.
